# Supplementary material for: Effects of High-Intensity Interval Training Using the 3/7 Resistance Training Method on Metabolic Stress in People with Heart Failure and Coronary Artery Disease: A Randomized Cross-Over Study
Source: MDPI journal article supplement (doi:10.3390/jcm12247743), 2023-12-17
Supplement: s1 [file s1]

---

Supplementary Material

Table S1. Iron metabolism; numerical results of metabolites evolution.

|                                                         | HFrEF<br>n=9      | CAD<br>n=6   | P-value |
|---------------------------------------------------------|-------------------|--------------|---------|
| <b>Time since diagnosis (days) *</b>                    | 558<br>(168-2666) | 101 (82-136) | <0.01   |
| <b>Creatine</b>                                         | 1.16 (0.3)        | 0.95 (0.08)  | 0.09    |
| <b>Hemoglobin, g·L<sup>-1</sup></b>                     | 14.2 (1)          | 14.2 (2)     | 0.782   |
| <b>Serum iron, µg·dL<sup>-1</sup></b>                   | 77 (33)           | 86 (41)      | 0.723   |
| <b>Transferrin, g·L<sup>-1</sup></b>                    | 232 (25)          | 262 (53)     | 0.391   |
| <b>Transferrin sat, %</b>                               | 27 (13)           | 29 (8)       | 0.894   |
| <b>Total iron binding capacity (µg·dL<sup>-1</sup>)</b> | 297 (25)          | 282 (157)    | 0.641   |

Values are mean ± SD

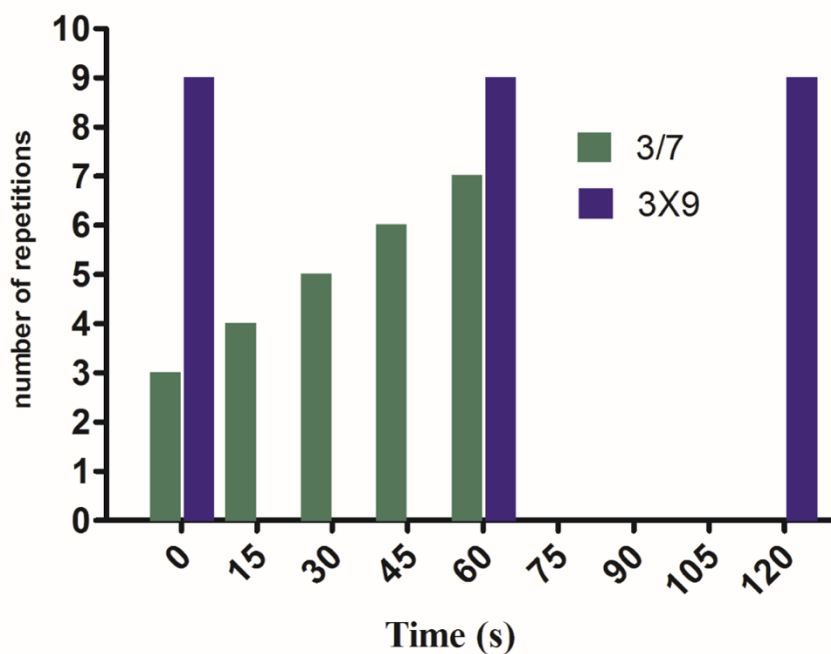

Figure S1. Organization of 3/7 and 3X9 method of resistance training.

---
